# Supplementary material for: Gene flow and the genealogical history of Heliconius heurippa
Source: PubMed Central journal article supplement (PMC2391162; doi:10.1186/1471-2148-8-132), 2008-05-02
Supplement: 1471-2148-8-132-S1.pdf [file 1471-2148-8-132-S1.pdf]

| Figure code | Identification number | species                | Locality                          | CO <sup>a</sup> | Tpi <sup>a</sup> | Dll | inv | w | sd | Collection date |
|-------------|-----------------------|------------------------|-----------------------------------|-----------------|------------------|-----|-----|---|----|-----------------|
|             |                       |                        | San Cristobal, Merida , Venezuela |                 |                  |     |     |   |    | 16/10/02        |
| C1          | M187                  | <i>H. c. cordula</i>   | 7°47'35'' N, 72°11'44''W          | *               | *                | √   | √   | √ | √  |                 |
|             |                       |                        | San Cristobal, Merida , Venezuela |                 |                  |     |     |   |    | 13/06/02        |
| C2          | M105                  | <i>H. c. cordula</i>   | 7°47'35'' N, 72°11'44''W          | *               | -                | √   | √   | √ | -  |                 |
|             |                       |                        | San Cristobal, Merida , Venezuela |                 |                  |     |     |   |    | 13/06/02        |
| C3          | M104                  | <i>H. c. cordula</i>   | 7°47'35'' N, 72°11'44''W          | *               | *                | √   | -   | √ | √  |                 |
|             |                       |                        | San Cristobal, Merida , Venezuela |                 |                  |     |     |   |    | 13/06/02        |
| C4          | M101                  | <i>H. c. cordula</i>   | 7°47'35'' N, 72°11'44''W          | *               | *                | √   | √   | √ | √  |                 |
|             |                       |                        | San Cristobal, Merida , Venezuela |                 |                  |     |     |   |    | 16/10/02        |
| C5          | M182                  | <i>H. c. cordula</i>   | 7°47'35'' N, 72°11'44''W          | *               | *                | √   | -   | √ | √  |                 |
|             |                       |                        | San Cristobal, Merida , Venezuela |                 |                  |     |     |   |    | 9/08/02         |
| C6          | M110                  | <i>H. c. cordula</i>   | 7°47'35'' N, 72°11'44''W          | -               | -                | √   | √   | - | -  |                 |
|             |                       |                        | San Cristobal, Merida , Venezuela |                 |                  |     |     |   |    | 9/08/02         |
| C7          | M111                  | <i>H. c. cordula</i>   | 7°47'35'' N, 72°11'44''W          | -               | -                | -   | √   | - | -  |                 |
|             |                       |                        | San Cristobal, Merida , Venezuela |                 |                  |     |     |   |    | 9/08/02         |
| C8          | M189                  | <i>H. c. cordula</i>   | 7°47'35'' N, 72°11'44''W          | -               | -                | -   | √   | - | -  |                 |
|             |                       |                        | San Cristobal, Merida , Venezuela |                 |                  |     |     |   |    | 9/08/02         |
| C9          | M199                  | <i>H. c. cordula</i>   | 7°47'35'' N, 72°11'44''W          | -               | -                | -   | √   | - | -  |                 |
|             |                       | <i>H. m. melpomene</i> | Chirajara, Cundinamarca, Co.      |                 |                  |     |     |   |    | 28/02/98        |
| M1          | Stri-b-13             |                        | 4° 12' 48''N, 73°47'70''W         | *               | *                | √   | √   | √ | -  |                 |
|             |                       | <i>H. m. melpomene</i> | Santa Ana, Merida, Venezuela      |                 |                  |     |     |   |    | 13/06/02        |
| M2          | M113                  |                        | 7° 36'41''N, 72°18'10''W          | *               | *                | √   | √   | √ | √  |                 |
|             |                       | <i>H. m. melpomene</i> | Chirajara, Cundinamarca, Co.      |                 |                  |     |     |   |    | 15/07/02        |
| M3          | M95                   |                        | 4° 12' 48''N, 73°47'70''W         | *               | *                | √   | √   | √ | √  |                 |
|             |                       | <i>H. m. melpomene</i> | Chirajara, Cundinamarca, Co.      |                 |                  |     |     |   |    | 28/02/98        |
| M4          | Stri-b-9              |                        | 4° 12' 48''N, 73°47'70''W         | *               | *                | √   | √   | √ | √  |                 |
|             |                       | <i>H. m. melpomene</i> | Chirajara, Cundinamarca, Co.      |                 |                  |     |     |   |    | 28/02/98        |
| M5          | Stri-b-11             |                        | 4° 12' 48''N, 73°47'70''W         | *               | *                | √   | √   | √ | -  |                 |
|             |                       | <i>H. m. melpomene</i> | Chirajara, Cundinamarca, Co.      |                 |                  |     |     |   |    | 28/02/98        |
| M6          | Stri-b-12             |                        | 4° 12' 48''N, 73°47'70''W         | *               | *                | √   | √   | √ | √  |                 |
|             |                       | <i>H. m. melpomene</i> | Santa Ana, Merida, Venezuela      |                 |                  |     |     |   |    | 9/08/02         |
| M7          | M119                  |                        | 7° 36'41''N, 72°18'10''W          | *               | *                | -   | √   | - | -  |                 |
|             |                       | <i>H. m. melpomene</i> | Santa Ana, Merida, Venezuela      |                 |                  |     |     |   |    | 13/06/02        |
| M8          | M115                  |                        | 7° 36'41''N, 72°18'10''W          | *               | *                | -   | -   | - | -  |                 |
|             |                       |                        | Chirajara, Cundinamarca, Co.      |                 |                  |     |     |   |    | 28/02/98        |
| H1          | Stri-b-40             | <i>H. heurippa</i>     | 4° 12' 48''N, 73°47'70''W         | √               | √                | √   | √   | √ | √  |                 |

|     |           |                    |                              |   |   |   |   |   |   |  |          |
|-----|-----------|--------------------|------------------------------|---|---|---|---|---|---|--|----------|
|     |           |                    | Chirajara, Cundinamarca, Co. |   |   |   |   |   |   |  | 28/02/98 |
| H2  | Stri-b-51 | <i>H. heurippa</i> | 4° 12' 48''N, 73°47'70''W    | ✓ | ✓ | ✓ | ✓ | ✓ | - |  |          |
|     |           |                    | Chirajara, Cundinamarca, Co. |   |   |   |   |   |   |  | 28/02/98 |
| H3  | Stri-b-44 | <i>H. heurippa</i> | 4° 12' 48''N, 73°47'70''W    | ✓ | ✓ | ✓ | ✓ | ✓ | ✓ |  |          |
|     |           |                    | Chirajara, Cundinamarca, Co. |   |   |   |   |   |   |  | 2/08/02  |
| H4  | M17       | <i>H. heurippa</i> | 4° 12' 48''N, 73°47'70''W    | ✓ | ✓ | ✓ | - | ✓ | ✓ |  |          |
|     |           |                    | Chirajara, Cundinamarca, Co. |   |   |   |   |   |   |  | 2/08/02  |
| H5  | M12       | <i>H. heurippa</i> | 4° 12' 48''N, 73°47'70''W    | ✓ | ✓ | ✓ | ✓ | ✓ | ✓ |  |          |
|     |           |                    | Chirajara, Cundinamarca, Co. |   |   |   |   |   |   |  | 15/07/02 |
| H6  | M145      | <i>H. heurippa</i> | 4° 12' 48''N, 73°47'70''W    | ✓ | - | ✓ | ✓ | - | - |  |          |
|     |           |                    | Chirajara, Cundinamarca, Co. |   |   |   |   |   |   |  | 28/02/98 |
| H7  | Stri-b-39 | <i>H. heurippa</i> | 4° 12' 48''N, 73°47'70''W    | ✓ | ✓ | ✓ | ✓ | ✓ | - |  |          |
|     |           |                    | Chirajara, Cundinamarca, Co. |   |   |   |   |   |   |  | 2/08/02  |
| H8  | M8        | <i>H. heurippa</i> | 4° 12' 48''N, 73°47'70''W    | ✓ | ✓ | ✓ | ✓ | - | - |  |          |
|     |           |                    | Chirajara, Cundinamarca, Co. |   |   |   |   |   |   |  | 28/02/98 |
| H9  | Stri-b-34 | <i>H. heurippa</i> | 4° 12' 48''N, 73°47'70''W    | ✓ | ✓ | - | ✓ | - | - |  |          |
|     |           |                    | Chirajara, Cundinamarca, Co. |   |   |   |   |   |   |  | 15/07/02 |
| H10 | M141      | <i>H. heurippa</i> | 4° 12' 48''N, 73°47'70''W    | ✓ | ✓ | - | ✓ | - | - |  |          |
|     |           |                    | Chirajara, Cundinamarca, Co. |   |   |   |   |   |   |  | 2/08/02  |
| H11 | M4        | <i>H. heurippa</i> | 4° 12' 48''N, 73°47'70''W    | ✓ | ✓ | - | - | - | - |  |          |

<sup>a</sup> Mitochondrial and sex-linked sequences for *H. c. cordula* (C) and *H. m. melpomene*

(M) indicated with \* were taken from GenBank. (DQ019244-DQ019246, DQ019250, DQ019251, DQ19234-DQ19239 for *H. c. cordula* and AY548139, DQ019243, DQ019247-DQ019249, DQ019252-DQ019254, DQ019228-DQ019233, DQ019240, AY548151 for *H. m. melpomene*). The following CoI and CoII sequences were also included: *H. c. chioneus* (AF413672, AF413707, AF512978, AF512980, AF512985, AF512989, AF512990-AF512993, AY548130), *H. m. rosina* (AF413673, AF413674, AF512971, AF512972, AF512977, AF512982-AF512984, AF512987), *H. c. weymeri* (AY548114-AY548116), *H. m. mocoa* (AY548118-AY548129, AY548131-AY548138) and *H. hecale* (AF413683).
